# Supplementary material for: A QTL on the short arm of wheat (Triticum aestivum L.) chromosome 3B affects the stability of grain weight in plants exposed to a brief heat shock early in grain filling
Source: PubMed Central journal article supplement (PMC4841048; doi:10.1186/s12870-016-0784-6), 2016-04-22
Supplement: 12870_2016_784_MOESM1_ESM.pdf [file 12870_2016_784_MOESM1_ESM.pdf]

**Table S1. Measured temperatures (°C) in greenhouse in Experiments 1 and 2.**

|                |                  | <b>Ave. day<br/>temp.</b> | <b>Ave. night<br/>temp.</b> | <b>Ave. min.<br/>temp.</b> | <b>Ave. max.<br/>temp.</b> | <b>Min.<br/>temp.</b> | <b>Max.<br/>temp.</b> | <b>No. days<br/>over<br/>30°C</b> |
|----------------|------------------|---------------------------|-----------------------------|----------------------------|----------------------------|-----------------------|-----------------------|-----------------------------------|
| <b>Expt. 1</b> | <b>March</b>     | 24.1                      | 19.9                        | 18.5                       | 28.8                       | 17.7                  | 33.5                  | 2                                 |
|                | <b>April</b>     | 23.4                      | 19.3                        | 18.1                       | 26.6                       | 16.5                  | 29.8                  | 0                                 |
|                | <b>May</b>       | 22.3                      | 18.8                        | 17.7                       | 25                         | 16.3                  | 26.8                  | 0                                 |
|                | <b>June</b>      | 22.2                      | 18.8                        | 17.7                       | 24.7                       | 16.7                  | 25.4                  | 0                                 |
|                | <b>July</b>      | 22.3                      | 18.7                        | 17.7                       | 25.1                       | 17.5                  | 29.5                  | 0                                 |
|                | <b>August</b>    | 22.2                      | 18.6                        | 17.5                       | 25                         | 17.3                  | 25.9                  | 0                                 |
| <b>Expt. 2</b> | <b>July</b>      | 22.3                      | 18.6                        | 17.6                       | 26.1                       | 17.5                  | 29.7                  | 0                                 |
|                | <b>August</b>    | 22.2                      | 18.6                        | 17.5                       | 25                         | 17.2                  | 25.8                  | 0                                 |
|                | <b>September</b> | 22.8                      | 18.8                        | 17.6                       | 26                         | 17                    | 29.9                  | 0                                 |
|                | <b>October</b>   | 23.2                      | 18.3                        | 16.9                       | 28.6                       | 14.7                  | 33.2                  | 9                                 |
|                | <b>November</b>  | 24.7                      | 19.2                        | 17.7                       | 29.4                       | 14.9                  | 33                    | 11                                |
|                | <b>December</b>  | 23.3                      | 20.9                        | 19.5                       | 26.6                       | 17.1                  | 31                    | 2                                 |

Anthesis and maturity occurred May-June and July-August in the first trial and in September-October and November-December in the second trial, respectively.
