# Supplementary material for: A QTL on the short arm of wheat (Triticum aestivum L.) chromosome 3B affects the stability of grain weight in plants exposed to a brief heat shock early in grain filling
Source: PubMed Central journal article supplement (PMC4841048; doi:10.1186/s12870-016-0784-6), 2016-04-22
Supplement: 12870_2016_784_MOESM5_ESM.pdf [file 12870_2016_784_MOESM5_ESM.pdf]

Table S5. Details of all QTL effects identified in the Drysdale x Waagan mapping population in the two heat tolerance experiments.

| QTL   | Trait     | Condition          | Expt. | Linkage group | cM position | Most closely-associated marker(s) | Positive allele | Test statistic $-\log_{10}(p)$ | R <sup>2</sup> | Additive effect |
|-------|-----------|--------------------|-------|---------------|-------------|-----------------------------------|-----------------|--------------------------------|----------------|-----------------|
| QTL1  | GFD       | Control            | 2     | 1A1           | 59.7        | wsnp_Ex_c1997_3756118             | D               | 6.3                            | 7.3            | 0.52            |
| QTL1  | FLSe      | Control            | 2     | 1A1           | 56.1        | wsnp_Ku_c10292_17066821           | D               | 3.8                            | 5.4            | 0.89            |
| QTL1  | SGW       | Control            | 1     | 1A1           | 36.5        | wsnp_Ex_c200_391493               | W               | 4.3                            | 5.6            | 1.07            |
| QTL1  | PH        | Control            | 2     | 1A1           | 66.2        | wsnp_BE517729A_Ta_2_1             | W               | 4.2                            | 1.1            | 1.94            |
| QTL1  | ShW       | Heat               | 2     | 1A1           | 48.2        | wsnp_Ku_c23926_33870364           | W               | 4.9                            | 2.0            | 0.08            |
| QTL1  | PH        | Heat               | 2     | 1A1           | 67.6        | wsnp_Ex_c5060_8985678             | W               | 4.9                            | 1.5            | 2.31            |
| QTL2  | GWS       | Control            | 2     | 1A2           | 0.0         | wsnp_Ku_c40759_48907151           | D               | 3.9                            | 6.7            | 0.17            |
| QTL2  | GNS       | Control            | 2     | 1A2           | 0.0         | wsnp_Ku_c40759_48907151           | D               | 4.7                            | 7.9            | 2.73            |
| QTL2  | ChIR27    | Control            | 2     | 1A2           | 0.0         | wsnp_Ku_c40759_48907151           | W               | 4.6                            | 11.3           | 0.04            |
| QTL2  | ChIC10DAA | Control (pre-heat) | 1     | 1A2           | 0.0         | wsnp_Ku_c40759_48907151           | D               | 3.8                            | 4.1            | 0.34            |
| QTL2  | ChIR27    | Heat               | 2     | 1A2           | 0.0         | wsnp_Ku_c40759_48907151           | W               | 4.4                            | 10.7           | 0.10            |
| QTL2  | ChIR27    | HSI                | 2     | 1A2           | 0.0         | wsnp_Ku_c40759_48907151           | D               | 5.9                            | 11.0           | 0.30            |
| QTL3  | SGW       | Heat               | 2     | 1B            | 83.4        | wsnp_Ku_c18227_27490539           | W               | 4.3                            | 6.8            | 0.97            |
| QTL4  | FL        | Control (pre-heat) | 1     | 2A            | 0.0         | wsnp_Ex_c2772_5130007             | W               | 3.9                            | 7.6            | 0.30            |
| QTL5  | ChIC13DAA | Control            | 2     | 2A            | 78.0        | wsnp_Ex_rep_c102538_87682273      | W               | 5.1                            | 10.0           | 0.49            |
| QTL5  | ChIC27DAA | Control            | 1     | 2A            | 75.0        | wsnp_Ex_c42720_49228237           | W               | 5.0                            | 9.0            | 0.48            |
| QTL5  | ChIC27DAA | Control            | 2     | 2A            | 80.9        | wsnp_Ra_c4503_8155485             | W               | 5.2                            | 9.2            | 0.43            |
| QTL5  | AUSC      | Control            | 1     | 2A            | 75.0        | wsnp_Ex_c42720_49228237           | W               | 4.5                            | 8.1            | 7.88            |
| QTL5  | AUSC      | Control            | 2     | 2A            | 80.9        | wsnp_Ra_c4503_8155485             | W               | 5.9                            | 10.5           | 7.86            |
| QTL5  | ChIC10DAA | Control (pre-heat) | 1     | 2A            | 75.0        | wsnp_Ex_c42720_49228237           | W               | 4.0                            | 4.1            | 0.34            |
| QTL5  | ChIC10DAA | Control (pre-heat) | 2     | 2A            | 108.4       | wsnp_Ex_c3808_6924802             | W               | 4.3                            | 8.7            | 0.47            |
| QTL5  | FW        | Control (pre-heat) | 2     | 2A            | 109.9       | wsnp_Ex_c59095_60108185           | W               | 5.4                            | 6.8            | 0.03            |
| QTL5  | DTM       | Heat               | 1     | 2A            | 88.4        | wsnp_Ex_c5984_10493714            | W               | 3.8                            | 7.1            | 0.69            |
| QTL5  | PH        | Heat               | 1     | 2A            | 60.1        | wsnp_BQ168780B_Ta_2_1             | D               | 4.3                            | 1.3            | 2.08            |
| QTL6  | ChIC27DAA | Control            | 2     | 2B1           | 0.0         | wsnp_Ra_c14112_22155451           | W               | 6.0                            | 11.5           | 0.48            |
| QTL6  | AUSC      | Control            | 2     | 2B1           | 0.0         | wsnp_Ra_c14112_22155451           | W               | 4.3                            | 7.9            | 6.83            |
| QTL6  | DTA       | Control (pre-heat) | 2     | 2B1           | 5.4         | wsnp_Ra_c14112_22155451           | D               | 3.8                            | 6.9            | 0.72            |
| QTL7  | FL        | Control (pre-heat) | 1     | 2B1           | 133.1       | wsnp_RFL_Contig1892_1042675       | D               | 6.4                            | 13.9           | 0.41            |
| QTL7  | FL        | Control (pre-heat) | 2     | 2B1           | 126.3       | wsnp_JD_c6010_7167159             | D               | 6.2                            | 13.5           | 0.43            |
| QTL8  | ChIC13DAA | Control            | 1     | 2D3           | 0.0         | wsnp_Ex_c2258_4232538             | D               | 8.3                            | 12.7           | 0.55            |
| QTL8  | ChIC27DAA | Control            | 1     | 2D3           | 0.0         | wsnp_Ex_c2258_4232538             | D               | 6.4                            | 11.6           | 0.55            |
| QTL8  | AUSC      | Control            | 1     | 2D3           | 0.0         | wsnp_Ex_c2258_4232538             | D               | 7.1                            | 13.3           | 10.09           |
| QTL8  | ChIC10DAA | Control (pre-heat) | 1     | 2D3           | 0.0         | wsnp_Ex_c2258_4232538             | D               | 8.3                            | 14.0           | 0.63            |
| QTL8  | ShW       | Heat               | 2     | 2D3           | 3.6         | wsnp_JD_c5919_7081809             | D               | 4.6                            | 3.2            | 0.10            |
| QTL8  | ChIC13DAA | Heat               | 1     | 2D3           | 5.8         | wsnp_Ex_c7260_12463738            | D               | 6.1                            | 8.5            | 0.91            |
| QTL8  | ChIC27DAA | Heat               | 1     | 2D3           | 5.0         | wsnp_Ex_c20011_29041563           | D               | 5.4                            | 6.7            | 0.87            |
| QTL8  | AUSC      | Heat               | 1     | 2D3           | 5.8         | wsnp_Ex_c7260_12463738            | D               | 6.4                            | 8.1            | 15.04           |
| QTL9  | GWS       | Control            | 1     | 2D4           | 25.6        | wsnp_Ku_c30494_40319867           | D               | 5.4                            | 7.9            | 0.09            |
| QTL9  | SGW       | Control            | 2     | 2D4           | 32.4        | wsnp_RFL_Contig2659_2346243       | D               | 3.5                            | 6.1            | 0.86            |
| QTL9  | ShW       | Control            | 1     | 2D4           | 25.6        | wsnp_Ku_c30494_40319867           | D               | 4.0                            | 5.6            | 0.08            |
| QTL9  | ShW       | Control            | 2     | 2D4           | 18.8        | wsnp_Ku_c30494_40319867           | D               | 4.0                            | 2.8            | 0.09            |
| QTL9  | GWS       | Heat               | 1     | 2D4           | 25.6        | wsnp_Ku_c30494_40319867           | D               | 5.5                            | 7.8            | 0.09            |
| QTL9  | SGW       | Heat               | 2     | 2D4           | 32.4        | wsnp_RFL_Contig2659_2346243       | D               | 3.5                            | 7.5            | 1.02            |
| QTL9  | ShW       | Heat               | 1     | 2D4           | 25.6        | wsnp_Ku_c30494_40319867           | D               | 5.4                            | 4.3            | 0.07            |
| QTL10 | PH        | Control            | 2     | 3A2           | 15.3        | wsnp_Ex_c4069_7354375             | D               | 7.1                            | 1.5            | 2.27            |
| QTL10 | FW        | Control (pre-heat) | 2     | 3A2           | 30.4        | wsnp_Ex_c25668_34932304           | D               | 5.4                            | 6.0            | 0.02            |
| QTL10 | ShW       | Heat               | 1     | 3A2           | 15.3        | wsnp_Ex_c4069_7354375             | D               | 3.9                            | 2.0            | 0.05            |
| QTL10 | PH        | Heat               | 1     | 3A2           | 24.0        | wsnp_Ex_c1141_2191485             | D               | 3.9                            | 1.1            | 1.94            |
| QTL10 | PH        | Heat               | 2     | 3A2           | 15.3        | wsnp_Ex_c4069_7354376             | D               | 6.6                            | 2.1            | 2.75            |

Table S5 (continued)

| QTL   | Trait     | Condition          | Expt. | Linkage group | cM position | Most closely-associated marker(s)                 | Positive allele | Test statistic<br>-Log <sub>10</sub> (p) | R <sup>2</sup> | Additive effect |
|-------|-----------|--------------------|-------|---------------|-------------|---------------------------------------------------|-----------------|------------------------------------------|----------------|-----------------|
| QTL11 | ChIC13DAA | Control            | 1     | 3B1           | 1.4         | wsnp_Ex_c12875_20407926                           | W               | 7.7                                      | 14.6           | 0.59            |
| QTL11 | ChIC13DAA | Control            | 2     | 3B1           | 1.4         | wsnp_Ex_c12875_20407926                           | W               | 8.9                                      | 19.4           | 0.67            |
| QTL11 | ChIC27DAA | Control            | 1     | 3B1           | 0.0         | wsnp_Ra_c41135_48426638                           | W               | 8.6                                      | 17.1           | 0.66            |
| QTL11 | ChIC27DAA | Control            | 2     | 3B1           | 0.0         | wsnp_Ra_c41135_48426638                           | W               | 11.5                                     | 23.0           | 0.68            |
| QTL11 | AUSC      | Control            | 1     | 3B1           | 0.0         | wsnp_Ra_c41135_48426638                           | W               | 7.5                                      | 15.2           | 10.78           |
| QTL11 | AUSC      | Control            | 2     | 3B1           | 1.4         | wsnp_Ex_c12875_20407926                           | W               | 10.5                                     | 20.4           | 10.98           |
| QTL11 | HI        | Control            | 2     | 3B1           | 0.0         | wsnp_Ra_c41135_48426638                           | D               | 8.7                                      | 11.5           | 0.94            |
| QTL11 | ChIC10DAA | Control (pre-heat) | 1     | 3B1           | 1.4         | wsnp_Ex_c12875_20407926                           | W               | 10.7                                     | 17.9           | 0.71            |
| QTL11 | ChIC10DAA | Control (pre-heat) | 2     | 3B1           | 1.4         | wsnp_Ex_c12875_20407926                           | W               | 7.4                                      | 16.8           | 0.65            |
| QTL11 | GFD       | Heat               | 1     | 3B1           | 1.4         | wsnp_Ex_c12875_20407926                           | W               | 6.4                                      | 13.1           | 0.76            |
| QTL11 | FLSe      | Heat               | 1     | 3B1           | 3.2         | wsnp_BE497169B_Ta_2_1                             | W               | 5.5                                      | 14.2           | 2.06            |
| QTL11 | GWS       | Heat               | 1     | 3B1           | 11.0        | wsnp_BE497169B_Ta_2_1                             | W               | 7.1                                      | 11.2           | 0.11            |
| QTL11 | SGW       | Heat               | 1     | 3B1           | 11.0        | wsnp_BE497169B_Ta_2_1                             | W               | 7.0                                      | 11.5           | 1.65            |
| QTL11 | ShW       | Heat               | 1     | 3B1           | 11.0        | wsnp_BE497169B_Ta_2_1                             | W               | 17.9                                     | 14.2           | 0.14            |
| QTL11 | ShW       | Heat               | 2     | 3B1           | 40.5        | wsnp_Ku_c3817_7009093/<br>wsnp_Ex_c44375_50444756 | W               | 5.8                                      | 3.5            | 0.10            |
| QTL11 | ChIC13DAA | Heat               | 1     | 3B1           | 1.4         | wsnp_Ex_c12875_20407926                           | W               | 26.0                                     | 42.0           | 2.01            |
| QTL11 | ChIC13DAA | Heat               | 2     | 3B1           | 0.0         | wsnp_Ra_c41135_48426638                           | W               | 16.0                                     | 34.3           | 1.95            |
| QTL11 | ChIC27DAA | Heat               | 1     | 3B1           | 1.4         | wsnp_Ex_c12875_20407926                           | W               | 36.3                                     | 54.4           | 2.49            |
| QTL11 | ChIC27DAA | Heat               | 2     | 3B1           | 0.0         | wsnp_Ra_c41135_48426638                           | W               | 8.0                                      | 19.9           | 2.55            |
| QTL11 | AUSC      | Heat               | 1     | 3B1           | 1.4         | wsnp_Ex_c12875_20407926                           | W               | 33.2                                     | 48.6           | 36.94           |
| QTL11 | AUSC      | Heat               | 2     | 3B1           | 0.0         | wsnp_Ra_c41135_48426638                           | W               | 13.3                                     | 28.0           | 34.31           |
| QTL11 | ChIR13    | Heat               | 1     | 3B1           | 0.0         | wsnp_Ra_c41135_48426638                           | W               | 19.7                                     | 39.6           | 0.37            |
| QTL11 | ChIR13    | Heat               | 2     | 3B1           | 0.0         | wsnp_Ra_c41135_48426638                           | W               | 13.2                                     | 27.2           | 0.37            |
| QTL11 | ChIR27    | Heat               | 1     | 3B1           | 0.0         | wsnp_Ra_c41135_48426638                           | W               | 29.5                                     | 50.4           | 0.07            |
| QTL11 | GFD       | HSI                | 1     | 3B1           | 3.2         | wsnp_BE497169B_Ta_2_1                             | D               | 4.4                                      | 10.0           | 0.12            |
| QTL11 | FLSe      | HSI                | 1     | 3B1           | 1.4         | wsnp_Ex_c12875_20407926                           | D               | 6.7                                      | 14.4           | 0.27            |
| QTL11 | GWS       | HSI                | 1     | 3B1           | 3.2         | wsnp_BE497169B_Ta_2_1                             | D               | 8.8                                      | 21.6           | 1.16            |
| QTL11 | GWS       | HSI                | 2     | 3B1           | 0.0         | wsnp_Ra_c41135_48426638                           | D               | 5.9                                      | 15.0           | 0.38            |
| QTL11 | SGW       | HSI                | 1     | 3B1           | 3.2         | wsnp_BE497169B_Ta_2_1                             | D               | 8.1                                      | 20.1           | 0.92            |
| QTL11 | SGW       | HSI                | 2     | 3B1           | 1.4         | wsnp_Ex_c12875_20407926                           | D               | 4.7                                      | 10.8           | 0.16            |
| QTL11 | ShW       | HSI                | 1     | 3B1           | 3.2         | wsnp_BE497169B_Ta_2_1                             | D               | 9.3                                      | 22.8           | 1.62            |
| QTL11 | ChIC13DAA | HSI                | 1     | 3B1           | 1.4         | wsnp_Ex_c12875_20407926                           | D               | 16.6                                     | 35.7           | 0.67            |
| QTL11 | ChIC13DAA | HSI                | 2     | 3B1           | 0.0         | wsnp_Ra_c41135_48426638                           | D               | 10.0                                     | 23.9           | 0.81            |
| QTL11 | ChIC27DAA | HSI                | 1     | 3B1           | 1.4         | wsnp_Ex_c12875_20407926                           | D               | 21.3                                     | 38.6           | 1.28            |
| QTL11 | ChIC27DAA | HSI                | 2     | 3B1           | 0.0         | wsnp_Ra_c41135_48426638                           | D               | 5.3                                      | 13.4           | 0.62            |
| QTL11 | AUSC      | HSI                | 1     | 3B1           | 1.4         | wsnp_Ex_c12875_20407926                           | D               | 20.5                                     | 38.3           | 0.91            |
| QTL11 | AUSC      | HSI                | 2     | 3B1           | 0.0         | wsnp_Ra_c41135_48426638                           | D               | 7.3                                      | 18.3           | 0.67            |
| QTL11 | ChIR13    | HSI                | 1     | 3B1           | 0.0         | wsnp_Ra_c41135_48426638                           | D               | 16.3                                     | 39.7           | 0.55            |
| QTL11 | ChIR13    | HSI                | 2     | 3B1           | 0.0         | wsnp_Ra_c41135_48426638                           | D               | 13.2                                     | 27.2           | 0.80            |
| QTL11 | ChIR27    | HSI                | 2     | 3B1           | 0.0         | wsnp_Ra_c41135_48426638                           | D               | 9.3                                      | 19.4           | 0.40            |
| QTL11 | HI        | HSI                | 2     | 3B1           | 0.0         | wsnp_Ra_c41135_48426638                           | D               | 4.1                                      | 10.3           | 0.29            |
| QTL12 | SGW       | Heat               | 2     | 3B2           | 54.9        | wsnp_Ex_c1097_2105209                             | W               | 3.8                                      | 5.9            | 0.91            |
| QTL13 | GFD       | Control            | 1     | 4A1           | 0.0         | wsnp_Ex_c11474_18507872                           | D               | 4.7                                      | 9.4            | 0.53            |
| QTL13 | ChIC27DAA | HSI                | 1     | 4A1           | 0.0         | wsnp_Ex_c11474_18507872                           | D               | 4.7                                      | 7.4            | 0.56            |
| QTL13 | AUSC      | HSI                | 1     | 4A1           | 0.0         | wsnp_Ex_c11474_18507872                           | D               | 3.8                                      | 6.1            | 0.36            |
| QTL14 | SGW       | Heat               | 1     | 4A2           | 0.0         | wsnp_Ex_c41074_47987860                           | W               | 4.7                                      | 5.1            | 1.11            |
| QTL14 | ShW       | Heat               | 1     | 4A2           | 0.0         | wsnp_Ex_c41074_47987860                           | W               | 3.8                                      | 1.4            | 0.04            |
| QTL15 | PH        | Control            | 1     | 4A2           | 41.6        | wsnp_Ex_rep_c68569_67411985                       | W               | 5.6                                      | 2.2            | 2.74            |
| QTL15 | PH        | Control            | 2     | 4A2           | 42.3        | wsnp_RFL_Contig25_2082245                         | W               | 9.0                                      | 1.8            | 2.52            |
| QTL15 | FW        | Control (pre-heat) | 2     | 4A2           | 47.3        | wsnp_Ex_c55245_57821389                           | D               | 4.7                                      | 6.0            | 0.02            |
| QTL15 | GFD       | Heat               | 2     | 4A2           | 42.3        | wsnp_RFL_Contig25_2082245                         | D               | 4.6                                      | 4.2            | 0.49            |
| QTL15 | PH        | Heat               | 1     | 4A2           | 41.6        | wsnp_Ex_rep_c68569_67411985                       | W               | 6.0                                      | 1.8            | 2.47            |
| QTL15 | PH        | Heat               | 2     | 4A2           | 42.3        | wsnp_RFL_Contig25_2082245                         | W               | 7.3                                      | 2.3            | 2.90            |
| QTL15 | GFD       | HSI                | 2     | 4A2           | 42.3        | wsnp_RFL_Contig25_2082245                         | W               | 3.8                                      | 8.4            | 0.12            |

Table S5 (continued)

| QTL            | Trait  | Condition          | Expt. | Linkage group | cM position | Most closely-associated marker(s)                 | Positive allele | Test statistic -Log <sub>10</sub> (p) | R <sup>2</sup> | Additive effect |
|----------------|--------|--------------------|-------|---------------|-------------|---------------------------------------------------|-----------------|---------------------------------------|----------------|-----------------|
| QTL16          | DTM    | Control            | 1     | 4B            | 29.6        | wsnp_Ex_c17561_26284693                           | W               | 5.0                                   | 10.7           | 0.96            |
| QTL17 (Rht-B1) | GFD    | Control            | 2     | 4B            | 86.3        | wsnp_RFL_Contig4151_4728831                       | W               | 14.9                                  | 17.1           | 0.79            |
| QTL17 (Rht-B1) | FLSe   | Control            | 1     | 4B            | 83.9        | Rht-B1                                            | W               | 6.6                                   | 12.2           | 2.40            |
| QTL17 (Rht-B1) | FLSe   | Control            | 2     | 4B            | 86.3        | wsnp_RFL_Contig4151_4728831                       | W               | 7.4                                   | 11.9           | 1.32            |
| QTL17 (Rht-B1) | GWS    | Control            | 1     | 4B            | 83.9        | Rht-B1                                            | D               | 12.0                                  | 15.2           | 0.12            |
| QTL17 (Rht-B1) | SGW    | Control            | 1     | 4B            | 83.9        | Rht-B1                                            | D               | 14.2                                  | 21.5           | 2.09            |
| QTL17 (Rht-B1) | SGW    | Control            | 2     | 4B            | 83.9        | Rht-B1                                            | D               | 10.5                                  | 15.8           | 1.38            |
| QTL17 (Rht-B1) | ShW    | Control            | 1     | 4B            | 83.9        | Rht-B1                                            | D               | 16.8                                  | 18.6           | 0.14            |
| QTL17 (Rht-B1) | ShW    | Control            | 2     | 4B            | 83.9        | Rht-B1                                            | D               | 19.6                                  | 20.7           | 0.24            |
| QTL17 (Rht-B1) | PH     | Control            | 1     | 4B            | 83.9        | Rht-B1                                            | D               | 37.6                                  | 32.9           | 10.58           |
| QTL17 (Rht-B1) | PH     | Control            | 2     | 4B            | 83.9        | Rht-B1                                            | D               | 83.9                                  | 37.1           | 11.44           |
| QTL17 (Rht-B1) | HI     | Control            | 2     | 4B            | 77.7        | wsnp_Ex_c18433_27269748/ Rht-B1                   | W               | 15.8                                  | 23.8           | 1.35            |
| QTL17 (Rht-B1) | DTM    | Heat               | 2     | 4B            | 83.9        | Rht-B1                                            | W               | 3.8                                   | 5.9            | 0.62            |
| QTL17 (Rht-B1) | GFD    | Heat               | 2     | 4B            | 83.9        | Rht-B1                                            | W               | 11.1                                  | 21.2           | 1.11            |
| QTL17 (Rht-B1) | GWS    | Heat               | 1     | 4B            | 83.9        | Rht-B1                                            | D               | 12.5                                  | 15.1           | 0.13            |
| QTL17 (Rht-B1) | GWS    | Heat               | 2     | 4B            | 83.9        | Rht-B1                                            | D               | 3.8                                   | 5.7            | 0.12            |
| QTL17 (Rht-B1) | SGW    | Heat               | 1     | 4B            | 86.3        | wsnp_RFL_Contig4151_4728831                       | D               | 26.0                                  | 33.0           | 2.81            |
| QTL17 (Rht-B1) | SGW    | Heat               | 2     | 4B            | 83.9        | Rht-B1                                            | D               | 6.1                                   | 10.2           | 1.19            |
| QTL17 (Rht-B1) | ShW    | Heat               | 1     | 4B            | 83.9        | Rht-B1                                            | D               | 34.2                                  | 23.1           | 0.17            |
| QTL17 (Rht-B1) | ShW    | Heat               | 2     | 4B            | 83.9        | Rht-B1                                            | D               | 32.6                                  | 26.5           | 0.28            |
| QTL17 (Rht-B1) | PH     | Heat               | 1     | 4B            | 83.9        | Rht-B1                                            | D               | 46.3                                  | 36.8           | 11.19           |
| QTL17 (Rht-B1) | PH     | Heat               | 2     | 4B            | 83.9        | Rht-B1                                            | D               | 44.9                                  | 35.9           | 11.38           |
| QTL17 (Rht-B1) | HI     | Heat               | 2     | 4B            | 77.7        | wsnp_Ex_c18433_27269748/ Rht-B1                   | W               | 12.0                                  | 25.4           | 1.22            |
| QTL18          | DTM    | Control            | 1     | 4B            | 135.5       | wsnp_Ex_c4148_7495656                             | W               | 4.6                                   | 7.9            | 0.83            |
| QTL18          | DTM    | Control            | 2     | 4B            | 135.5       | wsnp_Ex_c4148_7495656                             | W               | 8.8                                   | 19.2           | 1.25            |
| QTL18          | GFD    | Control            | 2     | 4B            | 135.5       | wsnp_Ex_c4148_7495656                             | D               | 9.4                                   | 8.7            | 0.57            |
| QTL18          | FLSe   | Control            | 2     | 4B            | 135.5       | wsnp_Ex_c4148_7495656                             | D               | 16.4                                  | 27.9           | 2.02            |
| QTL18          | GWS    | Control            | 1     | 4B            | 135.5       | wsnp_Ex_c4148_7495656                             | W               | 7.8                                   | 9.5            | 0.09            |
| QTL18          | GWS    | Control            | 2     | 4B            | 135.5       | wsnp_Ex_c4148_7495656                             | W               | 7.1                                   | 12.5           | 0.23            |
| QTL18          | GNS    | Control            | 1     | 4B            | 135.5       | wsnp_Ex_c4148_7495656                             | W               | 5.5                                   | 10.3           | 1.48            |
| QTL18          | GNS    | Control            | 2     | 4B            | 135.5       | wsnp_Ex_c4148_7495656                             | W               | 9.0                                   | 15.5           | 3.83            |
| QTL18          | ShW    | Control            | 1     | 4B            | 135.5       | wsnp_Ex_c4148_7495656                             | W               | 4.4                                   | 5.1            | 0.07            |
| QTL18          | ShW    | Control            | 2     | 4B            | 135.5       | wsnp_Ex_c4148_7495658                             | W               | 11.1                                  | 9.8            | 0.17            |
| QTL18          | DTA    | Control (pre-heat) | 1     | 4B            | 135.5       | wsnp_Ex_c4148_7495656                             | W               | 21.7                                  | 37.1           | 1.48            |
| QTL18          | DTA    | Control (pre-heat) | 2     | 4B            | 135.5       | wsnp_Ex_c4148_7495656                             | W               | 20.5                                  | 35.9           | 1.65            |
| QTL18          | FL     | Control (pre-heat) | 2     | 4B            | 126.1       | wsnp_Ex_c39876_47057394                           | D               | 6.9                                   | 13.6           | 0.44            |
| QTL18          | FW     | Control (pre-heat) | 1     | 4B            | 108.3       | wsnp_CAP12_rep_c4278_1949864                      | W               | 10.1                                  | 20.4           | 0.03            |
| QTL18          | FW     | Control (pre-heat) | 2     | 4B            | 117.2       | wsnp_Ex_c39876_47057394                           | W               | 16.9                                  | 31.2           | 0.06            |
| QTL18          | DTM    | Heat               | 1     | 4B            | 141.3       | wsnp_BE403378B_Ta_2_1                             | W               | 7.1                                   | 14.0           | 0.97            |
| QTL18          | DTM    | Heat               | 2     | 4B            | 135.5       | wsnp_Ex_c4148_7495656                             | W               | 12.8                                  | 22.2           | 1.21            |
| QTL18          | GFD    | Heat               | 1     | 4B            | 108.3       | wsnp_CAP12_rep_c4278_1949864                      | D               | 7.5                                   | 19.8           | 0.93            |
| QTL18          | GFD    | Heat               | 2     | 4B            | 127.5       | wsnp_Ku_c11570_18860306                           | D               | 5.4                                   | 12.9           | 0.87            |
| QTL18          | FLSe   | Heat               | 2     | 4B            | 149.9       | wsnp_BE403378B_Ta_2_1/<br>wsnp_CAP7_c5487_2464794 | D               | 5.7                                   | 14.8           | 2.15            |
| QTL18          | GWS    | Heat               | 1     | 4B            | 135.5       | wsnp_Ex_c4148_7495656                             | W               | 4.1                                   | 4.4            | 0.07            |
| QTL18          | GWS    | Heat               | 2     | 4B            | 149.9       | wsnp_BE403378B_Ta_2_1                             | W               | 7.1                                   | 15.6           | 0.20            |
| QTL18          | GNS    | Heat               | 1     | 4B            | 135.5       | wsnp_Ex_c4148_7495656                             | W               | 3.9                                   | 4.7            | 0.98            |
| QTL18          | GNS    | Heat               | 2     | 4B            | 135.5       | wsnp_Ex_c4148_7495656                             | W               | 9.6                                   | 17.5           | 3.71            |
| QTL18          | ShW    | Heat               | 1     | 4B            | 135.5       | wsnp_Ex_c4148_7495657                             | W               | 5.0                                   | 2.6            | 0.06            |
| QTL18          | ShW    | Heat               | 2     | 4B            | 135.5       | wsnp_Ex_c4148_7495659                             | W               | 12.7                                  | 10.3           | 0.17            |
| QTL18          | GFD    | HSI                | 1     | 4B            | 99.5        | wsnp_CAP12_rep_c4278_1949864                      | W               | 5.5                                   | 12.4           | 0.13            |
| QTL18          | FLSe   | HSI                | 1     | 4B            | 117.2       | wsnp_Ex_c39876_47057394                           | W               | 6.5                                   | 17.7           | 0.30            |
| QTL18          | ChIR27 | HSI                | 2     | 4B            | 135.5       | wsnp_Ex_c4148_7495656                             | W               | 4.7                                   | 8.4            | 0.26            |

Table S5 (continued)

| QTL            | Trait     | Condition          | Expt. | Linkage group | cM position | Most closely-associated marker(s)                  | Positive allele | Test statistic<br>-Log <sub>10</sub> (p) | R <sup>2</sup> | Additive effect |
|----------------|-----------|--------------------|-------|---------------|-------------|----------------------------------------------------|-----------------|------------------------------------------|----------------|-----------------|
| QTL19 (Rht-D1) | GFD       | Control            | 2     | 4D            | 0.0         | Rht-D1                                             | D               | 10.8                                     | 12.1           | 0.66            |
| QTL19 (Rht-D1) | FLSe      | Control            | 1     | 4D            | 0.0         | Rht-D1                                             | D               | 6.2                                      | 11.3           | 2.30            |
| QTL19 (Rht-D1) | FLSe      | Control            | 2     | 4D            | 0.0         | Rht-D1                                             | D               | 12.5                                     | 19.1           | 1.68            |
| QTL19 (Rht-D1) | GWS       | Control            | 1     | 4D            | 0.0         | Rht-D1                                             | W               | 29.6                                     | 37.0           | 0.19            |
| QTL19 (Rht-D1) | GWS       | Control            | 2     | 4D            | 0.0         | Rht-D1                                             | W               | 8.4                                      | 15.4           | 0.26            |
| QTL19 (Rht-D1) | GNS       | Control            | 1     | 4D            | 0.0         | Rht-D1                                             | W               | 10.7                                     | 21.4           | 2.13            |
| QTL19 (Rht-D1) | GNS       | Control            | 2     | 4D            | 0.0         | Rht-D1                                             | W               | 7.5                                      | 13.1           | 3.53            |
| QTL19 (Rht-D1) | SGW       | Control            | 1     | 4D            | 0.0         | Rht-D1                                             | W               | 8.0                                      | 11.5           | 1.27            |
| QTL19 (Rht-D1) | SGW       | Control            | 2     | 4D            | 0.0         | Rht-D1                                             | W               | 9.1                                      | 12.9           | 1.25            |
| QTL19 (Rht-D1) | ShW       | Control            | 1     | 4D            | 0.0         | Rht-D1                                             | W               | 39.9                                     | 47.3           | 0.23            |
| QTL19 (Rht-D1) | ShW       | Control            | 2     | 4D            | 0.0         | Rht-D1                                             | W               | 50.5                                     | 48.7           | 0.37            |
| QTL19 (Rht-D1) | PH        | Control            | 1     | 4D            | 0.0         | Rht-D1                                             | W               | 50.0                                     | 56.5           | 13.87           |
| QTL19 (Rht-D1) | PH        | Control            | 2     | 4D            | 0.0         | Rht-D1                                             | W               | 62.3                                     | 56.4           | 14.11           |
| QTL19 (Rht-D1) | ChIC27DAA | Control            | 2     | 4D            | 2.9         | wsnp_CAP11_c356_280910                             | D               | 3.7                                      | 6.3            | 0.36            |
| QTL19 (Rht-D1) | HI        | Control            | 2     | 4D            | 0.0         | Rht-D1                                             | D               | 8.4                                      | 10.6           | 0.90            |
| QTL19 (Rht-D1) | DTM       | Heat               | 2     | 4D            | 0.0         | Rht-D1                                             | D               | 5.4                                      | 8.2            | 0.73            |
| QTL19 (Rht-D1) | GFD       | Heat               | 2     | 4D            | 0.0         | Rht-D1                                             | D               | 10.1                                     | 14.7           | 0.92            |
| QTL19 (Rht-D1) | FLSe      | Heat               | 2     | 4D            | 0.0         | Rht-D1                                             | D               | 5.5                                      | 11.6           | 1.90            |
| QTL19 (Rht-D1) | GWS       | Heat               | 1     | 4D            | 0.0         | Rht-D1                                             | W               | 23.8                                     | 28.7           | 0.18            |
| QTL19 (Rht-D1) | GWS       | Heat               | 2     | 4D            | 0.0         | Rht-D1                                             | W               | 12.4                                     | 23.1           | 0.25            |
| QTL19 (Rht-D1) | GNS       | Heat               | 1     | 4D            | 8.0         | wsnp_Ex_rep_c107564_91144523                       | W               | 8.2                                      | 16.5           | 1.85            |
| QTL19 (Rht-D1) | GNS       | Heat               | 2     | 4D            | 0.0         | Rht-D1                                             | W               | 10.3                                     | 18.9           | 3.86            |
| QTL19 (Rht-D1) | SGW       | Heat               | 1     | 4D            | 0.0         | Rht-D1                                             | W               | 7.6                                      | 10.0           | 1.17            |
| QTL19 (Rht-D1) | SGW       | Heat               | 2     | 4D            | 0.0         | Rht-D1                                             | W               | 5.8                                      | 9.5            | 1.15            |
| QTL19 (Rht-D1) | ShW       | Heat               | 1     | 4D            | 0.0         | Rht-D1                                             | W               | 58.9                                     | 37.9           | 0.22            |
| QTL19 (Rht-D1) | ShW       | Heat               | 2     | 4D            | 0.0         | Rht-D1                                             | W               | 55.0                                     | 42.5           | 0.35            |
| QTL19 (Rht-D1) | PH        | Heat               | 1     | 4D            | 0.0         | Rht-D1                                             | W               | 56.5                                     | 56.4           | 13.86           |
| QTL19 (Rht-D1) | PH        | Heat               | 2     | 4D            | 0.0         | Rht-D1                                             | W               | 54.0                                     | 52.6           | 13.78           |
| QTL19 (Rht-D1) | HI        | Heat               | 2     | 4D            | 0.0         | Rht-D1                                             | D               | 10.8                                     | 19.4           | 1.07            |
| QTL20          | ChIC13DAA | Control            | 1     | 5A2           | 11.9        | wsnp_Ex_c1481_2831499                              | D               | 6.7                                      | 8.6            | 0.45            |
| QTL20          | ChIC10DAA | Control (pre-heat) | 1     | 5A2           | 3.8         | wsnp_Ex_c1481_2831499                              | D               | 6.3                                      | 12.1           | 0.59            |
| QTL20          | ChIC13DAA | Heat               | 1     | 5A2           | 1.5         | wsnp_JD_c43389_30288993                            | D               | 4.6                                      | 6.3            | 0.78            |
| QTL20          | AUSC      | Heat               | 1     | 5A2           | 1.5         | wsnp_JD_c43389_30288993                            | D               | 4.4                                      | 5.4            | 12.28           |
| QTL20          | HI        | Heat               | 1     | 5A2           | 0.0         | wsnp_CAP11_c923_558715                             | D               | 4.1                                      | 9.2            | 0.31            |
| QTL21          | GFD       | Control            | 1     | 5A2           | 137.8       | wsnp_Ex_rep_c101757_87064771                       | W               | 5.3                                      | 10.5           | 0.56            |
| QTL21          | SGW       | Control            | 2     | 5A2           | 116.6       | wsnp_Ku_c14139_22353229                            | D               | 4.1                                      | 7.9            | 0.98            |
| QTL21          | HI        | Control            | 2     | 5A2           | 126.9       | wsnp_Ex_c3838_6981043                              | D               | 5.4                                      | 6.7            | 0.72            |
| QTL21          | FW        | Control (pre-heat) | 2     | 5A2           | 131.2       | wsnp_Ku_c23772_33711538                            | W               | 5.7                                      | 9.1            | 0.03            |
| QTL21          | GFD       | HSI                | 2     | 5A2           | 134.1       | wsnp_Ex_rep_c68829_67704044                        | D               | 4.8                                      | 11.6           | 0.14            |
| QTL22          | DTM       | HSI                | 1     | 5A2           | 216.2       | wsnp_Ex_c905_1748920                               | W               | 4.1                                      | 10.3           | 0.16            |
| QTL23          | SGW       | Control            | 2     | 5B2           | 20.8        | wsnp_Ku_c10296_17072695                            | D               | 5.7                                      | 7.9            | 0.98            |
| QTL23          | SGW       | Heat               | 2     | 5B2           | 20.8        | wsnp_Ku_c10296_17072695                            | D               | 4.4                                      | 7.1            | 0.99            |
| QTL24          | FW        | Control (pre-heat) | 1     | 5B2           | 62.5        | wsnp_BE499835B_Ta_2_5                              | D               | 4.6                                      | 7.2            | 0.02            |
| QTL24          | FW        | Control (pre-heat) | 2     | 5B2           | 62.5        | wsnp_BE499835B_Ta_2_5                              | D               | 6.9                                      | 11.3           | 0.03            |
| QTL25          | GFD       | Control            | 2     | 6A            | 70.7        | wsnp_JD_rep_c62949_40140212                        | D               | 7.0                                      | 6.9            | 0.50            |
| QTL25          | SGW       | Control            | 1     | 6A            | 66.0        | wsnp_Ex_c1104_2118684                              | D               | 4.2                                      | 5.5            | 1.06            |
| QTL25          | SGW       | Control            | 2     | 6A            | 66.0        | wsnp_Ex_c1104_2118684                              | D               | 7.1                                      | 9.8            | 1.09            |
| QTL25          | SGW       | Heat               | 2     | 6A            | 66.0        | wsnp_Ex_c1104_2118684                              | D               | 3.3                                      | 5.0            | 0.83            |
| QTL26          | GWS       | Heat               | 2     | 6B2           | 27.3        | wsnp_Ex_c42372_48966781                            | D               | 3.7                                      | 8.7            | 0.15            |
| QTL26          | GNS       | Heat               | 1     | 6B2           | 27.3        | wsnp_Ex_c42372_48966781                            | D               | 4.5                                      | 4.7            | 0.99            |
| QTL26          | ShW       | Heat               | 2     | 6B2           | 27.3        | wsnp_Ex_c42372_48966781                            | D               | 6.0                                      | 4.5            | 0.11            |
| QTL27          | AUSC      | Heat               | 2     | 6B3           | 9.1         | wsnp_Ex_c9038_15058444/<br>wsnp_Ex_c11573_18650189 | D               | 3.7                                      | 9.1            | 19.53           |
| QTL27          | ChIR13    | Heat               | 2     | 6B3           | 18.1        | wsnp_Ex_c11573_18650189                            | D               | 4.8                                      | 8.9            | 0.21            |
| QTL27          | SGW       | HSI                | 2     | 6B3           | 9.1         | wsnp_Ex_c11573_18650189                            | W               | 3.8                                      | 12.1           | 0.17            |
| QTL27          | ChIR13    | HSI                | 2     | 6B3           | 18.1        | wsnp_Ex_c11573_18650189                            | W               | 4.8                                      | 8.9            | 0.46            |
| QTL28          | HI        | Control            | 2     | 7A2           | 33.7        | wsnp_Ex_c2268_4251636                              | W               | 3.6                                      | 5.5            | 0.65            |

Table S5 (continued)

| QTL   | Trait | Condition          | Expt. | Linkage group | cM position | Most closely-associated marker(s)                 | Positive allele | Test statistic -Log <sub>10</sub> (p) | R <sup>2</sup> | Additive effect |
|-------|-------|--------------------|-------|---------------|-------------|---------------------------------------------------|-----------------|---------------------------------------|----------------|-----------------|
| QTL29 | DTM   | Control            | 1     | 7B            | 34.9        | wsnp_Ex_c24376_33619527                           | D               | 10.6                                  | 29.6           | 1.60            |
| QTL29 | DTM   | Control            | 2     | 7B            | 0.0         | wsnp_CAP8_c334_304253                             | D               | 4.0                                   | 8.2            | 0.82            |
| QTL29 | GFD   | Control            | 1     | 7B            | 34.9        | wsnp_Ex_c24376_33619527                           | D               | 6.0                                   | 18.0           | 0.73            |
| QTL29 | GFD   | Control            | 2     | 7B            | 0.0         | wsnp_CAP8_c334_304253                             | D               | 18.0                                  | 18.2           | 0.82            |
| QTL29 | FLSe  | Control            | 1     | 7B            | 25.4        | wsnp_JD_c1285_1848292/<br>wsnp_Ex_c24376_33619527 | D               | 8.1                                   | 26.5           | 3.53            |
| QTL29 | ShW   | Control            | 1     | 7B            | 0.0         | wsnp_CAP8_c334_304253                             | D               | 4.1                                   | 2.9            | 0.06            |
| QTL29 | DTA   | Control (pre-heat) | 1     | 7B            | 34.9        | wsnp_Ex_c24376_33619527                           | D               | 6.1                                   | 14.5           | 0.92            |
| QTL29 | FL    | Control (pre-heat) | 1     | 7B            | 34.9        | wsnp_Ex_c24376_33619527                           | D               | 5.3                                   | 16.9           | 0.45            |
| QTL29 | FL    | Control (pre-heat) | 2     | 7B            | 0.0         | wsnp_CAP8_c334_304253                             | D               | 4.5                                   | 8.6            | 0.35            |
| QTL29 | DTM   | Heat               | 1     | 7B            | 0.0         | wsnp_CAP8_c334_304253                             | D               | 6.3                                   | 12.7           | 0.92            |
| QTL29 | DTM   | Heat               | 2     | 7B            | 0.0         | wsnp_CAP8_c334_304253                             | D               | 5.2                                   | 8.1            | 0.73            |
| QTL29 | GFD   | Heat               | 1     | 7B            | 0.0         | wsnp_CAP8_c334_304253                             | D               | 5.9                                   | 11.3           | 0.70            |
| QTL29 | GFD   | Heat               | 2     | 7B            | 0.0         | wsnp_CAP8_c334_304253                             | D               | 6.0                                   | 8.2            | 0.69            |
| QTL29 | ShW   | Heat               | 1     | 7B            | 0.0         | wsnp_CAP8_c334_304254                             | D               | 4.0                                   | 2.6            | 0.06            |
| QTL29 | HI    | Heat               | 1     | 7B            | 6.5         | wsnp_JD_c1285_1848292                             | W               | 4.4                                   | 9.9            | 0.32            |
| QTL29 | FLSe  | HSI                | 1     | 7B            | 45.8        | wsnp_Ex_rep_c68815_67687712                       | D               | 3.9                                   | 7.5            | 0.20            |

Positive allele: D, Drysdale; W, Waagan; Positive allele for Heat Susceptibility Index (HSI) means associated with intolerance.

Additive effect always refers to the effect of the positive allele.

DTA, days from sowing to anthesis; DTM, days from sowing to maturity defined as 95% spike senescence; GFD, grain-filling duration defined as days from anthesis to 95% spike senescence; FLSe, days from anthesis to 95% flag leaf senescence; GWS, grain weight spike<sup>-1</sup> (g); GNS, grain number spike<sup>-1</sup>; SGW, single grain weight (mg); ShW, shoot dry weight (g); PH, plant height (cm); ChlC10DAA, chlorophyll content 10 days after anthesis, i.e., just before heat treatment period (SPAD units); ChlC13DAA, chlorophyll content 13 days after anthesis, i.e., just after heat treatment period (SPAD units); AUSC, area under the SPAD curve made from measurements at 10, 13 and 27 days after anthesis, i.e., incorporates the period during-heat treatment and 2-weeks after; ChlR13, rate of chlorophyll change between 10 and 13 days after anthesis, i.e., during the heat treatment period (SPAD units day<sup>-1</sup>); ChlR27, rate of chlorophyll change based on the linear regression of the measurements, at 10, 13 and 27 days after anthesis (SPAD units day<sup>-1</sup>); FL, flag leaf length (cm); FW, flag leaf width (cm); HI, harvest index (%).

QTL16 may belong to QTL17 (Rht-B1) based on its effect.
