# Supplementary material for: A QTL on the short arm of wheat (Triticum aestivum L.) chromosome 3B affects the stability of grain weight in plants exposed to a brief heat shock early in grain filling
Source: PubMed Central journal article supplement (PMC4841048; doi:10.1186/s12870-016-0784-6), 2016-04-22
Supplement: 12870_2016_784_MOESM9_ESM.pdf [file 12870_2016_784_MOESM9_ESM.pdf]

**Table S8. Summary statistics, by chromosome, for the Drysdale x Waagan linkage map.**

| <b>Chromosome</b> | <b>Number of non-redundant loci</b> | <b>Number of all loci</b> | <b>Length (cM)</b> | <b>Marker density* (cM per non-redundant locus)</b> | <b>Maximum spacing</b> |
|-------------------|-------------------------------------|---------------------------|--------------------|-----------------------------------------------------|------------------------|
| <b>1A</b>         | 50                                  | 182                       | 136                | 2.7                                                 | 29.6                   |
| <b>1B</b>         | 35                                  | 127                       | 145                | 4.1                                                 | 25.6                   |
| <b>1D</b>         | 13                                  | 75                        | 95                 | 7.3                                                 | 25.0                   |
| <b>2A</b>         | 45                                  | 267                       | 198                | 4.4                                                 | 30.8                   |
| <b>2B</b>         | 36                                  | 178                       | 145                | 4.0                                                 | 30.8                   |
| <b>2D</b>         | 19                                  | 56                        | 82                 | 4.3                                                 | 20.4                   |
| <b>3A</b>         | 26                                  | 147                       | 84                 | 3.3                                                 | 20.0                   |
| <b>3B</b>         | 37                                  | 183                       | 213                | 5.8                                                 | 35.1                   |
| <b>3D</b>         | 3                                   | 12                        | 3                  | 1.0                                                 | 2.2                    |
| <b>4A</b>         | 23                                  | 129                       | 73                 | 3.2                                                 | 20.0                   |
| <b>4B</b>         | 20                                  | 55                        | 158                | 7.9                                                 | 26.6                   |
| <b>4D</b>         | 13                                  | 18                        | 49                 | 3.8                                                 | 22.4                   |
| <b>5A</b>         | 46                                  | 195                       | 224                | 4.9                                                 | 34.9                   |
| <b>5B</b>         | 36                                  | 160                       | 150                | 4.2                                                 | 25.9                   |
| <b>5D</b>         | 9                                   | 26                        | 70                 | 7.8                                                 | 22.0                   |
| <b>6A</b>         | 30                                  | 230                       | 135                | 4.5                                                 | 31.7                   |
| <b>6B</b>         | 29                                  | 283                       | 109                | 3.8                                                 | 22.5                   |
| <b>6D</b>         | 10                                  | 27                        | 37                 | 3.7                                                 | 20.3                   |
| <b>7A</b>         | 32                                  | 159                       | 147                | 4.6                                                 | 28.2                   |
| <b>7B</b>         | 28                                  | 163                       | 165                | 5.9                                                 | 37.8                   |
| <b>7D</b>         | 11                                  | 39                        | 28                 | 2.5                                                 | 14.0                   |
| <b>Overall</b>    | <b>Tot. 551</b>                     | <b>Tot. 2711</b>          | <b>Tot. 2447.4</b> | <b>Ave. 4.44</b>                                    | <b>Ave. 37.8</b>       |

\*Not including the gap between linkage groups, when chromosomes were mapped as multiple linkage groups
